# Supplementary material
Source: PubMed Central journal article supplement (PMC7810363)
Supplement: NIHMS1647653-supplement-1.pdf [file NIHMS1647653-supplement-1.pdf]

1 **Supplementary Figures**

**A**

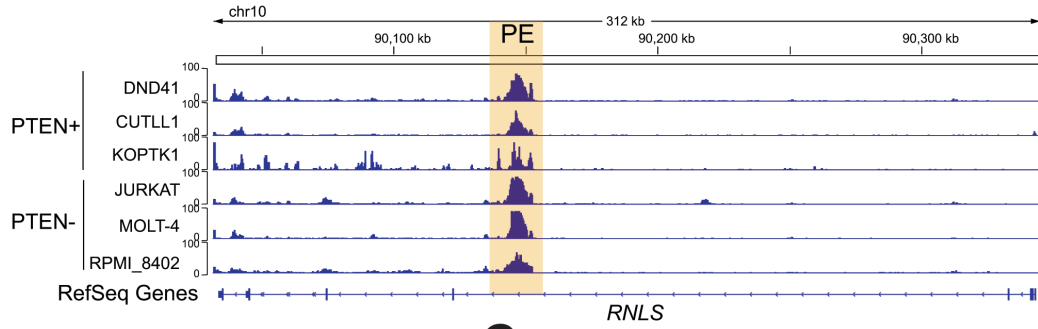

**B**

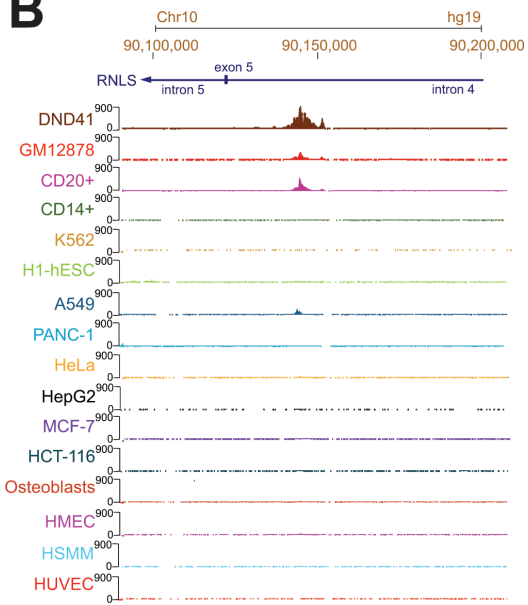

**C**

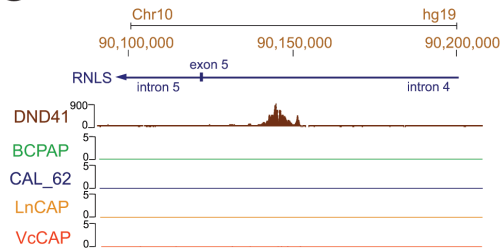

**D**

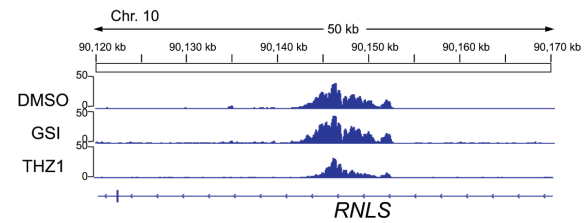

**E**

CD4 control

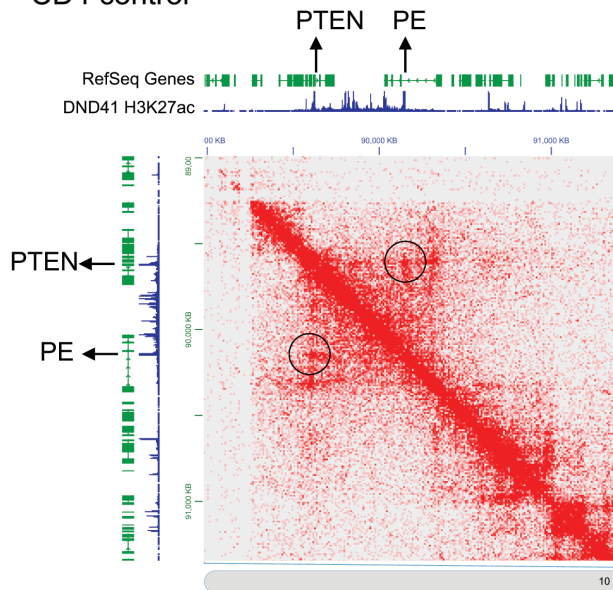

**F**

TALL178

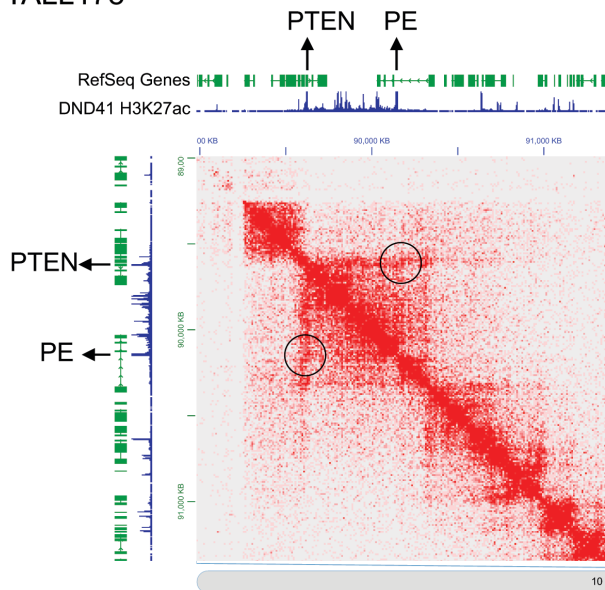

3 **Supplementary Figure 1.** H3K27ac ChIP-seq and Hi-C analyses along the human PE  
4 sequence. **A**, H3K27ac mark along the PE sequence in both PTEN-positive and PTEN-  
5 negative T-ALL cell lines. **B**, H3K27ac mark along the PE sequence in cells and cell lines  
6 from ENCODE, including DND41 T-ALL cells, GM12878 lymphoblastoid cells, B cells  
7 (CD20+), monocytes (CD14+), K562 erythroleukemia cells, H1 human embryonic stem  
8 cells, H1-hESC), A549 lung cancer cells, PANC-1 pancreatic cancer cells, HeLa cervical  
9 cancer cells, HepG2 liver cancer cells, MCF-7 breast cancer cells, HCT-116 colon cancer  
10 cells, osteoblasts, human mammary epithelial cells (HMEC), human skeletal muscle  
11 myoblast cells (HSMM) and human umbilical vein endothelial cells (HUVEC). **C**, H3K27ac  
12 mark along the PE sequence in DND41 T-ALL cells, as well as in BCPAP or CAL\_62  
13 thyroid cancer cells (24) and LnCAP or VcCAP prostate cancer cells (23). **D**, H3K27ac  
14 mark along the PE sequence in CUTLL1 control cells (DMSO), treated with a GSI or with  
15 a CDK7 inhibitor (THZ1) (19). **E-F**, Hi-C interaction profile (19) of the *PTEN* promoter and  
16 the PE enhancer in CD4 control T-cells (**E**) and a human primary T-ALL sample (**F**).  
17 Interaction is highlighted by black circles. RefSeq genes and H3K27ac mark in DND41  
18 cells are shown as reference.  
19

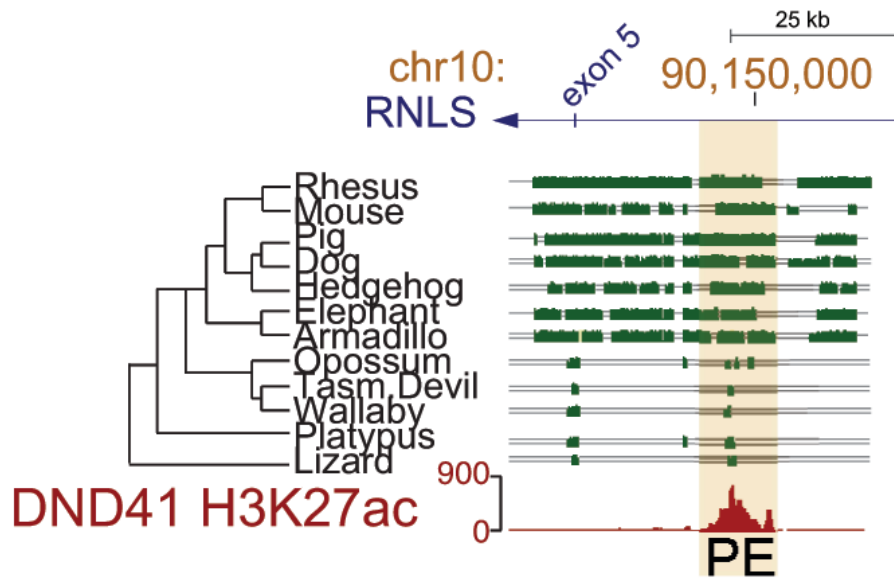

20

21 **Supplementary Figure 2.** Conservation of the PE DNA sequence. Multispecies  
 22 sequence conservation along a 50Kb window encompassing the DND41 H3K27  
 23 acetylation mark in PE (bottom). Green blocks represent pairwise aligned regions, and  
 24 the height of the bars indicates the average base pair alignment score with the human  
 25 sequence

26

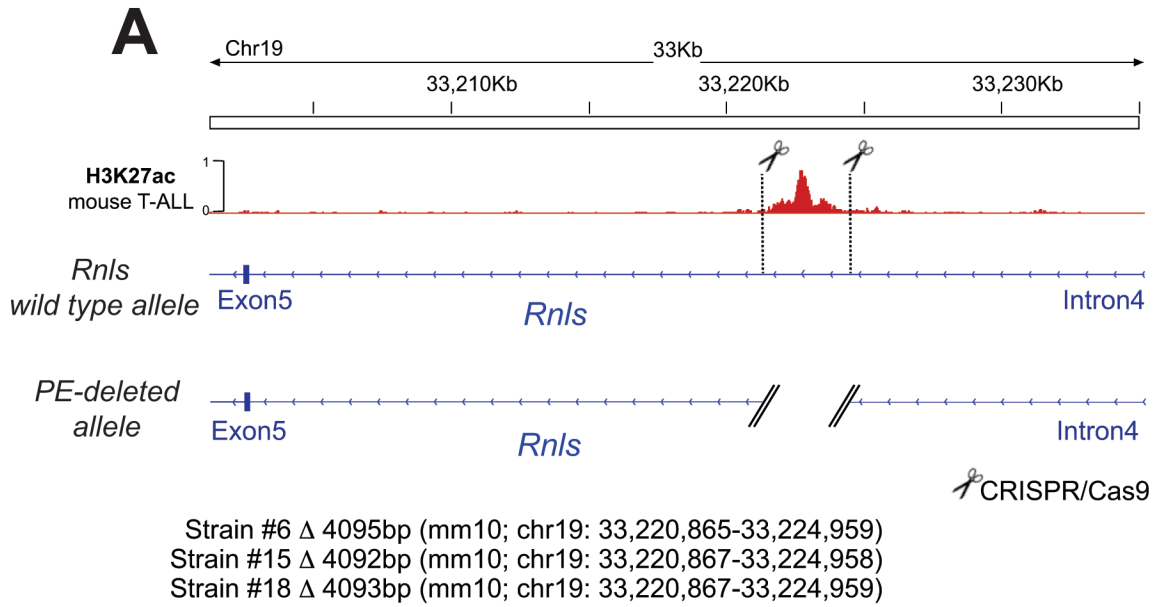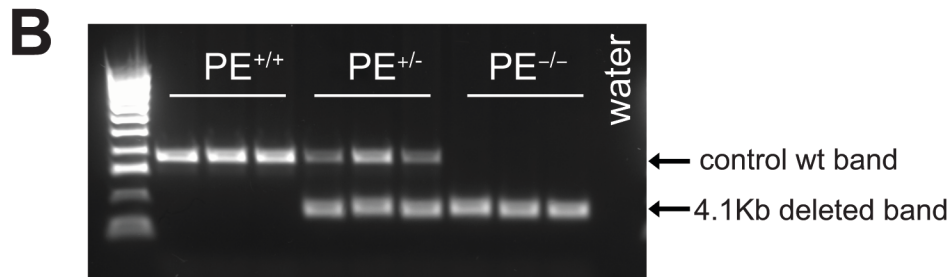

27

28 **Supplementary Figure 3.** Generation of novel mouse models with PE germinal deletion.

29 **A,** Schematic representation of the wild type *Rnls* locus and CRISPR/Cas9-strategy to  
30 obtain PE knockout mice. Strain-specific deletion coordinates are shown at the bottom.

31 **B,** Genotyping of PE knockout mice.

32

**A**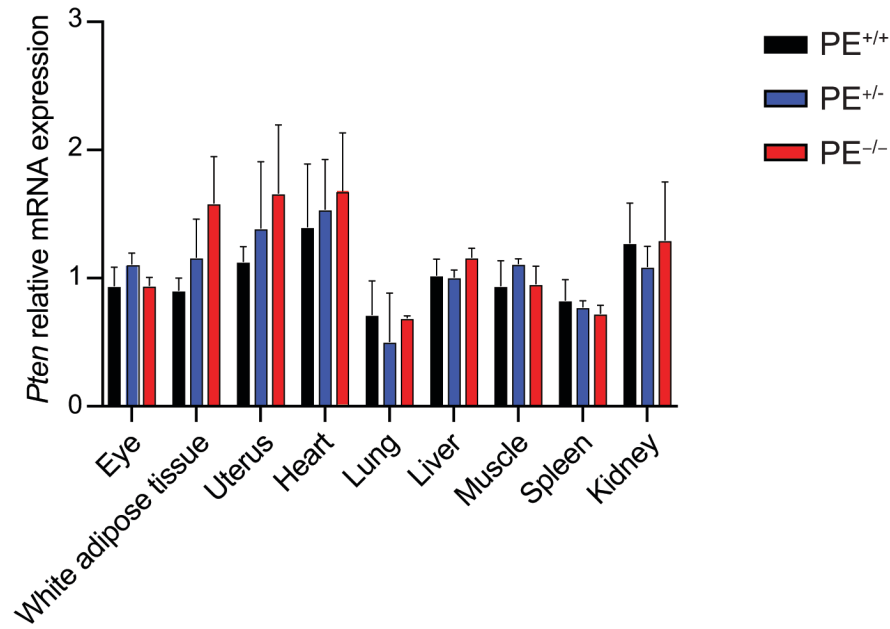**B**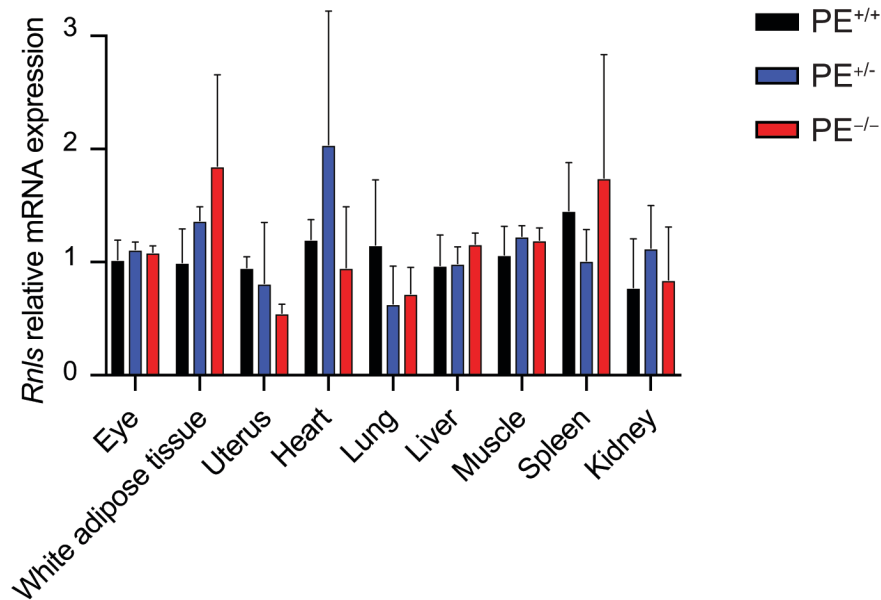

33

34 **Supplementary Figure 4.** *Pten* and *Rnls* expression in non-thymic tissues. **A-B**, RT-PCR  
35 analysis of *Pten* expression (**A**) and *Rnls* expression (**B**) in tissues obtained from PE wild-  
36 type and PE heterozygous or PE knockout mice. Bar graphs indicate mean values and  
37 error bars represent s.d.

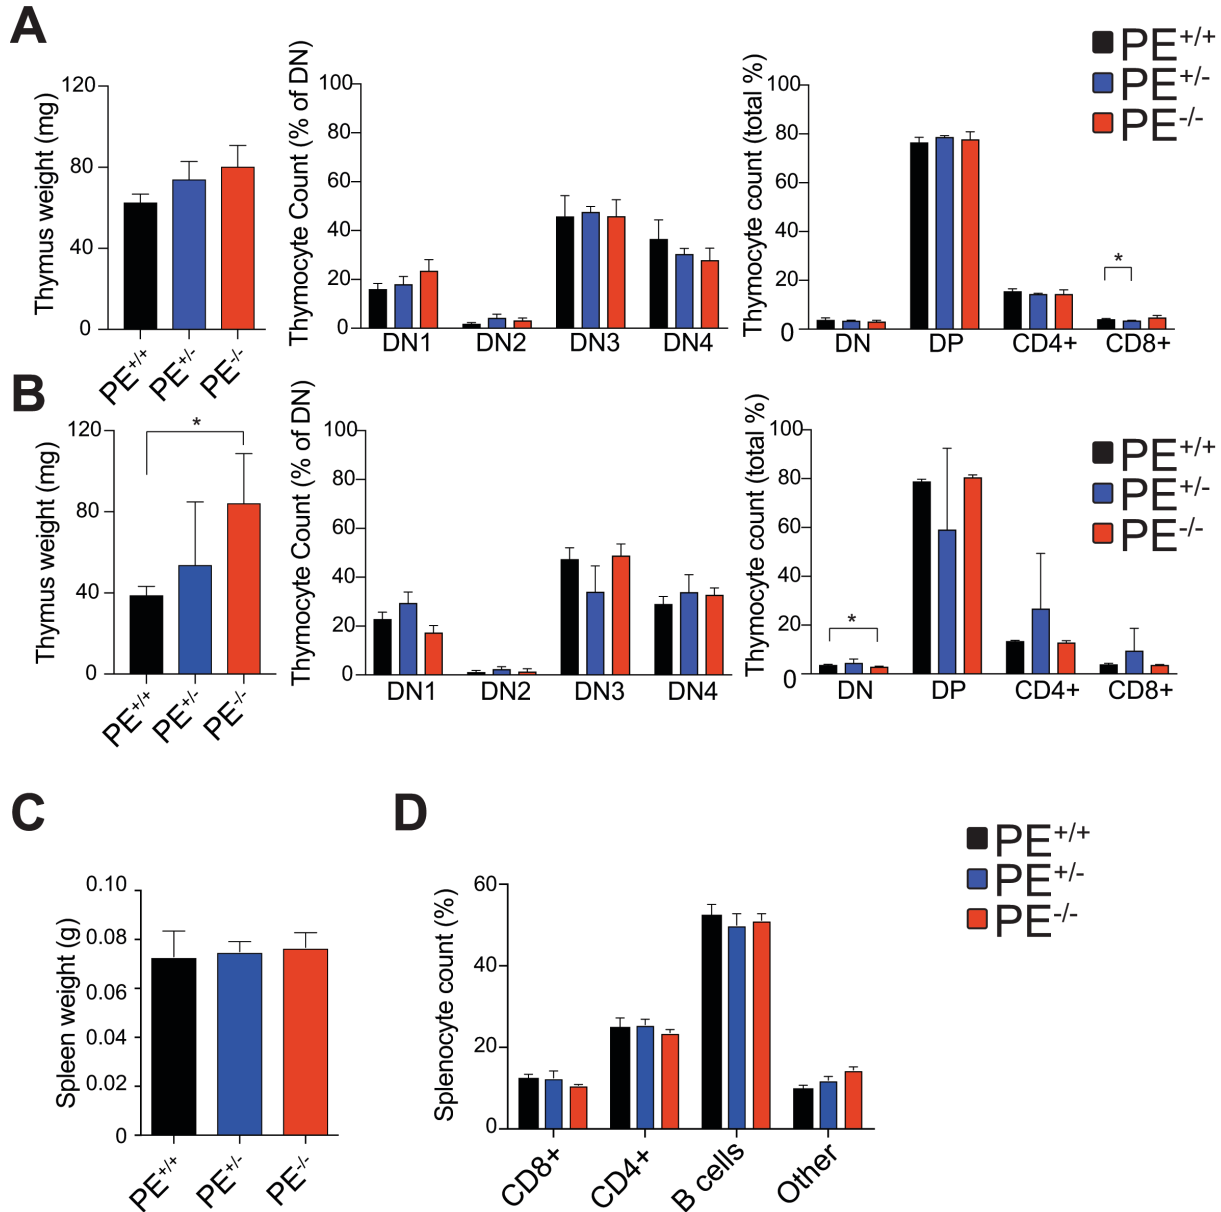

38

39 **Supplementary Figure 5.** Immunophenotypic analyses of PE wild-type, heterozygous or

40 knockout mice. **A-B**, Thymus weight and quantification of intrathymic T-cell populations

41 in 6-week-old wild-type (PE<sup>+/+</sup>), PE heterozygous knockout (PE<sup>+/-</sup>) and PE homozygous

42 knockout (PE<sup>-/-</sup>) mice from strain #15 (**A**) or strain #18 (**B**) (n = 3 per genotype). **C-D**,

43 Spleen weight (**C**) and quantification of lymphoid populations (**D**) in 6-week-old wild-type

44 (PE<sup>+/+</sup>), PE heterozygous knockout (PE<sup>+/-</sup>) and PE homozygous knockout (PE<sup>-/-</sup>) mice

45 (strain #6; n = 3 per genotype). Bar graphs indicate mean values and error bars represent  
46 s.d. Significance was calculated using two-tailed Student's t- test ( $*P < 0.05$ ; all other  
47 comparisons not significant).

48

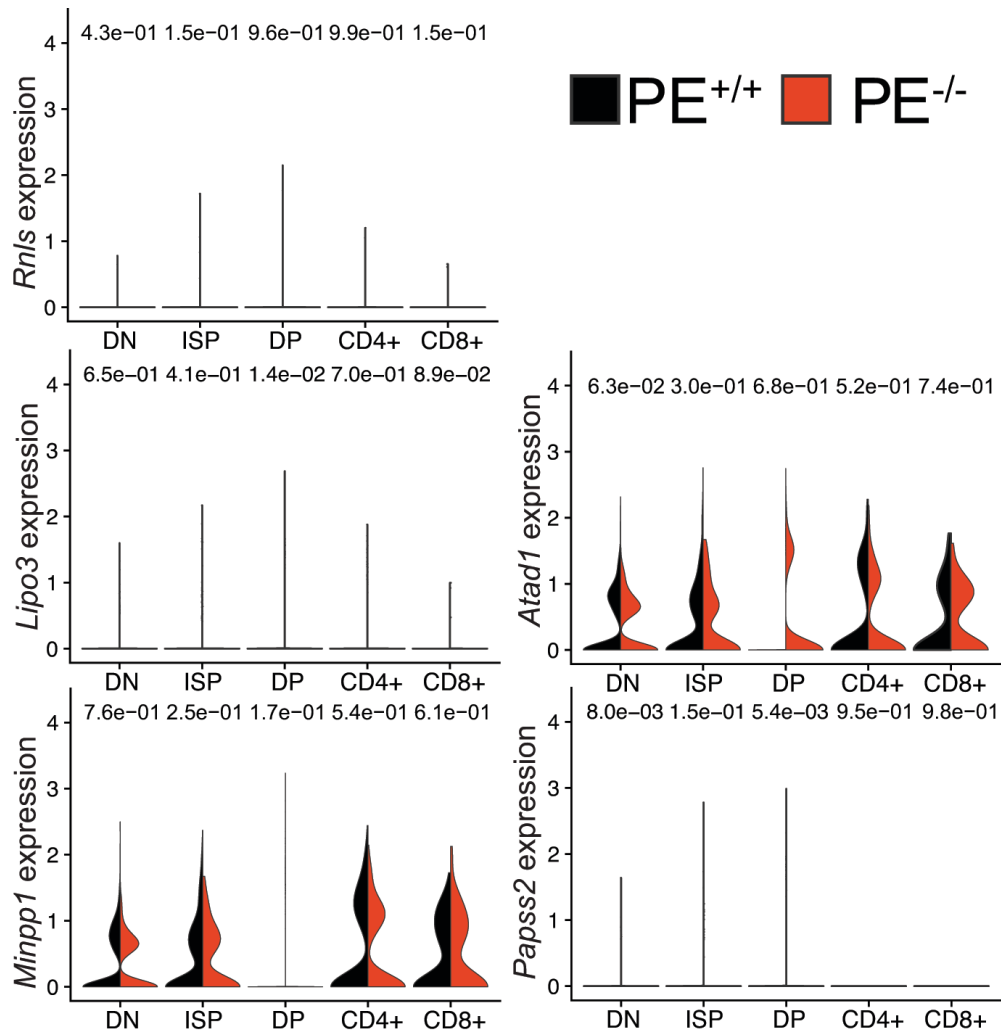

49

50 **Supplementary Figure 6.** Gene expression changes upon PE loss. Gene expression  
 51 changes in *Rnls* and other genes in neighboring TADs (*Atad1*, *Minpp1*, *Lipo3*, *Papss2*) in  
 52 scRNA-seq from normal thymus. *P* values in A calculated using the Wilcoxon rank-sum  
 53 test (no significant values were found).

54



**A**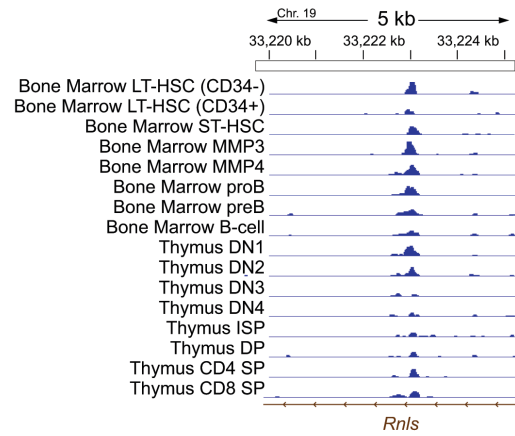**B**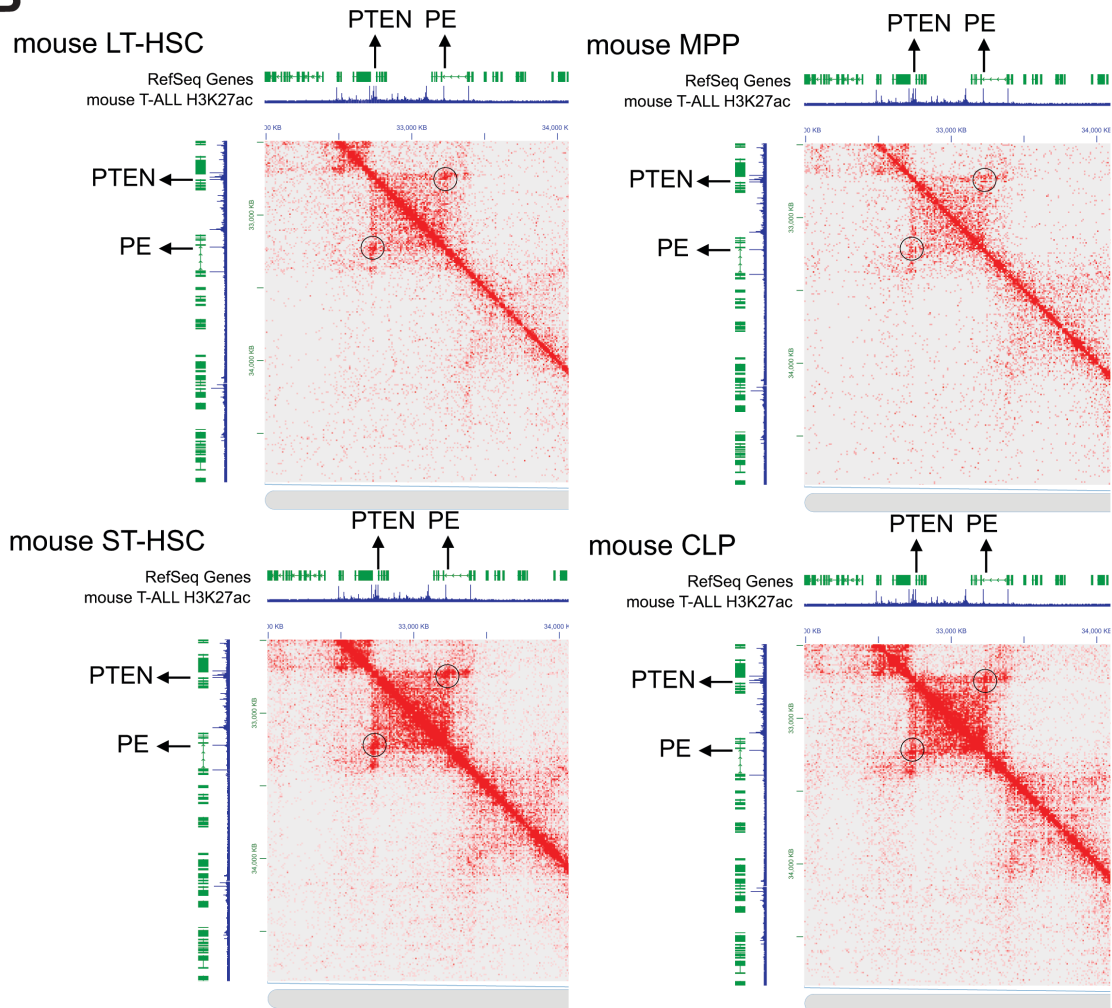

56 **Supplementary Figure 7.** ATAC-seq and tagHi-C analyses along the mouse PE  
57 sequence. **A**, ATACseq (GSE100738) showing open chromatin in PE in different mouse  
58 hematopoietic populations (LT-HSC= Long-Term Hematopoietic Stem Cells; ST-HSC=  
59 Short-Term Hematopoietic Stem Cells; MMP=Multipotent Progenitors; DN= CD4/CD8-  
60 Double Negative; ISP=Immature Single Positive; DP= CD4/CD8-Double Positive; SP=  
61 Single Positive). **B**, tagHi-C interactions (GSE152918) between the *Pten* promoter and  
62 the PE enhancer in different mouse hematopoietic progenitor cells. Interaction is  
63 highlighted by black circles. RefSeq genes and H3K27ac mark in mouse T-ALL cells are  
64 shown as reference.  
65

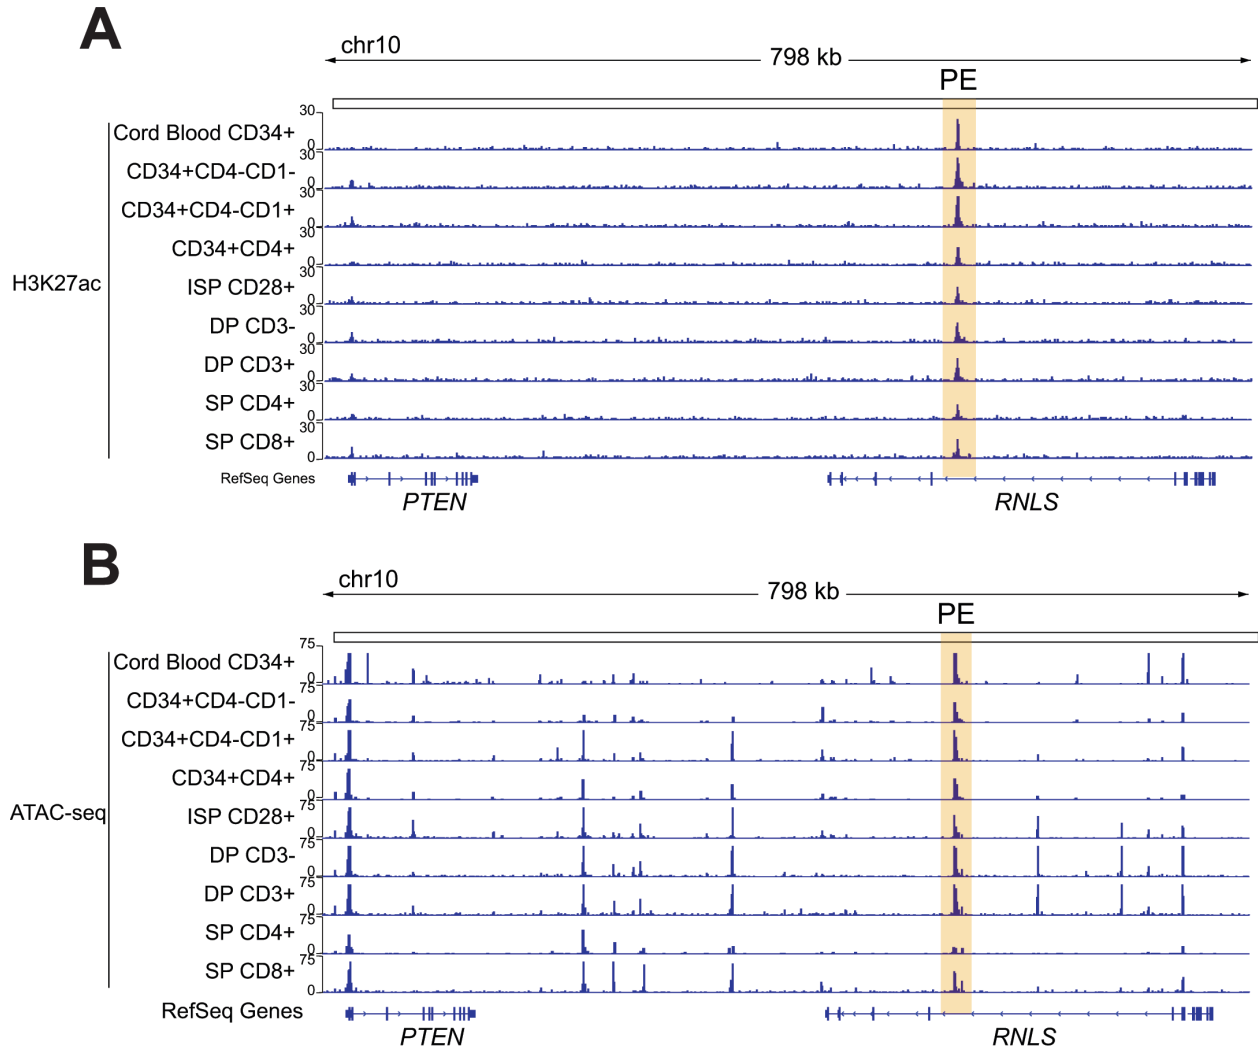

66

67 **Supplementary Figure 8.** Chromatin marks and chromatin opening in different human  
 68 hematopoietic and thymic populations. H3K27ac ChIPmentation tracks (**A**) and ATAC-  
 69 seq tracks (**B**) in human hematopoietic and thymic populations (ISP=Immature Single  
 70 Positive; DP= CD4/CD8-double positive; SP= Single Positive).

71

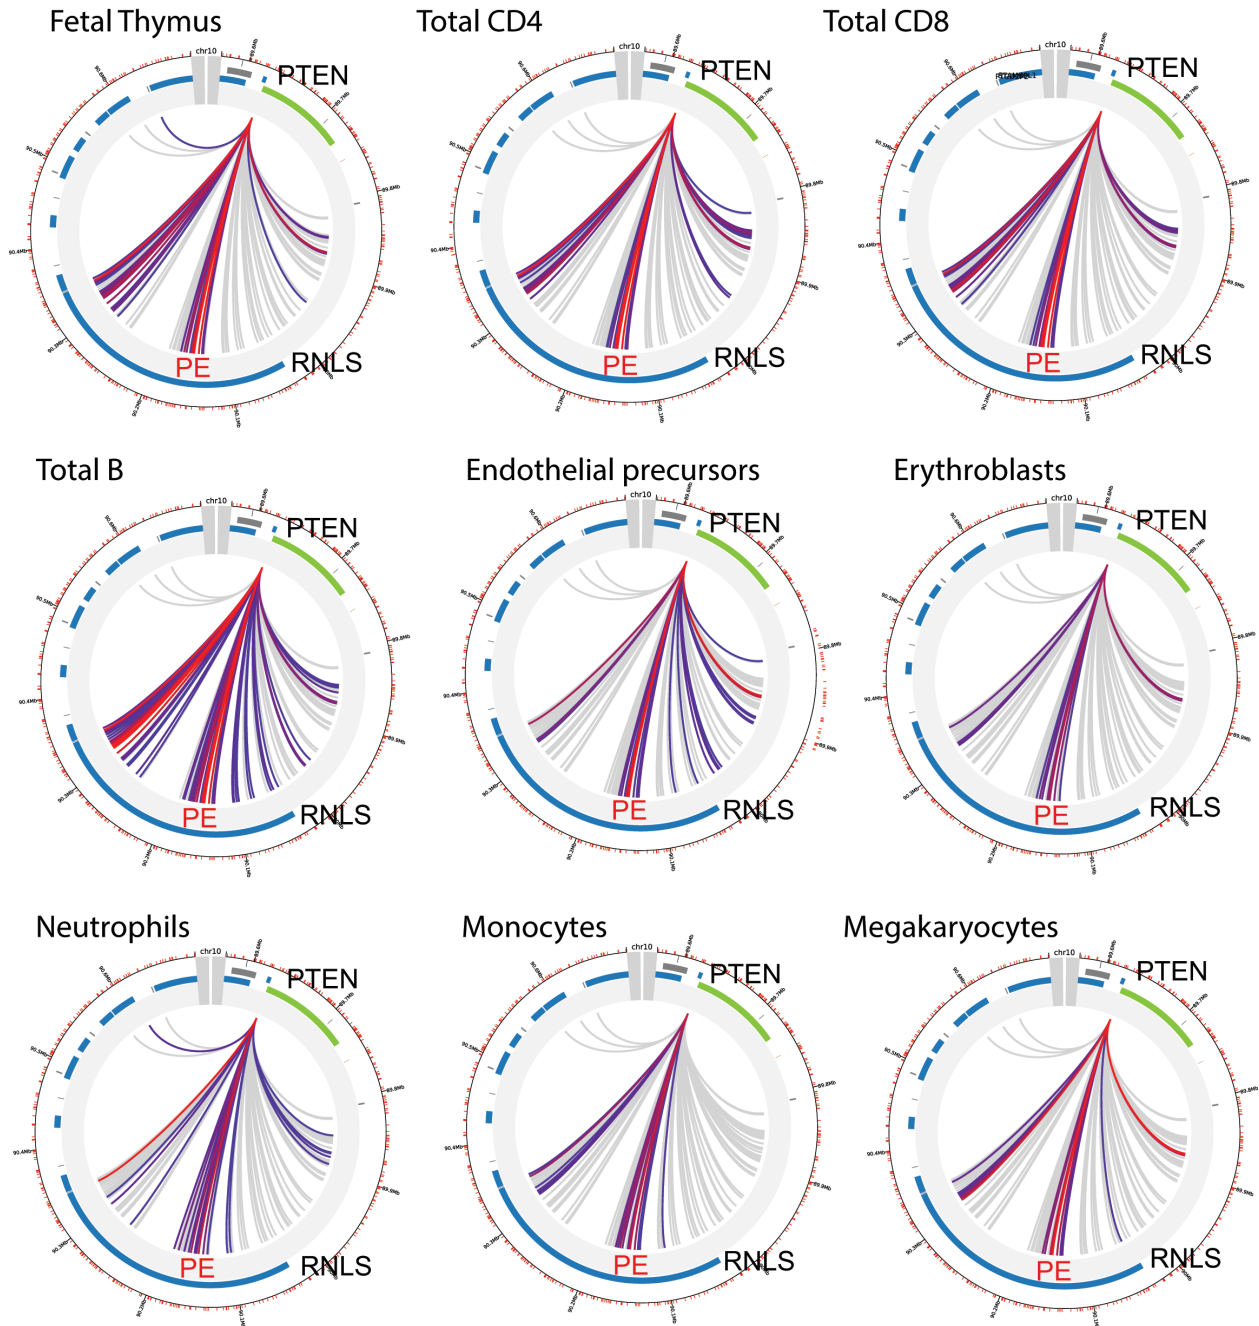

72

73 **Supplementary Figure 9.** Capture Hi-C shows interaction between the *PTEN* promoter  
 74 and the PE enhancer in different human hematopoietic cells. Red/blue/gray lines  
 75 represent interaction scores (70) (red=strongest; gray=weakest). PE is highlighted in red.

76

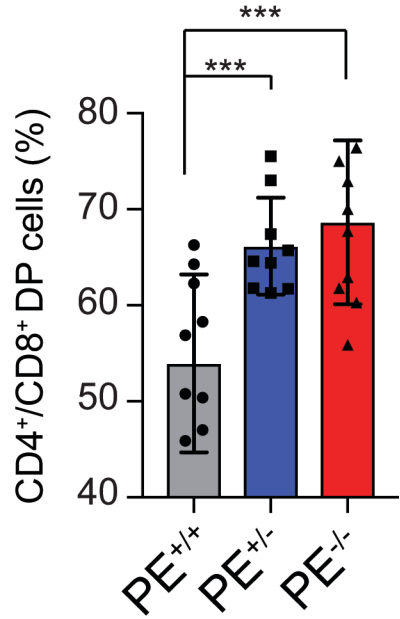

77

78 **Supplementary Figure 10.** CD4/CD8-double positive cells in peripheral blood 3 weeks  
79 after transplantation of NOTCH1-infected bone marrow progenitor cells (strain#6). \*\*\* $P <$   
80 0.005 using two-tailed Student's  $t$ -test.

81

82

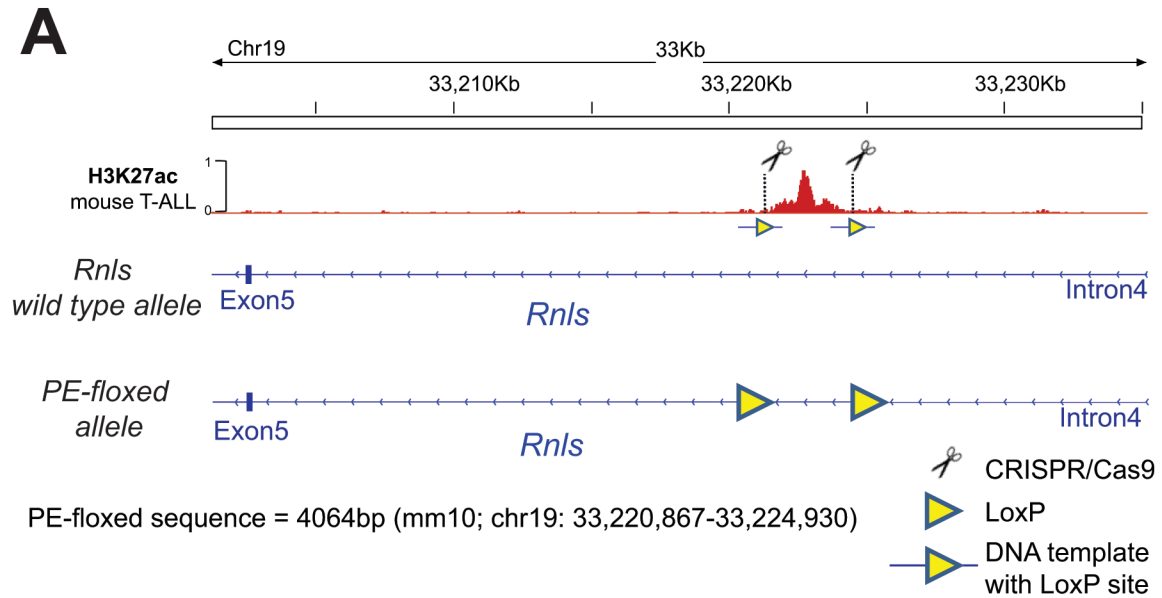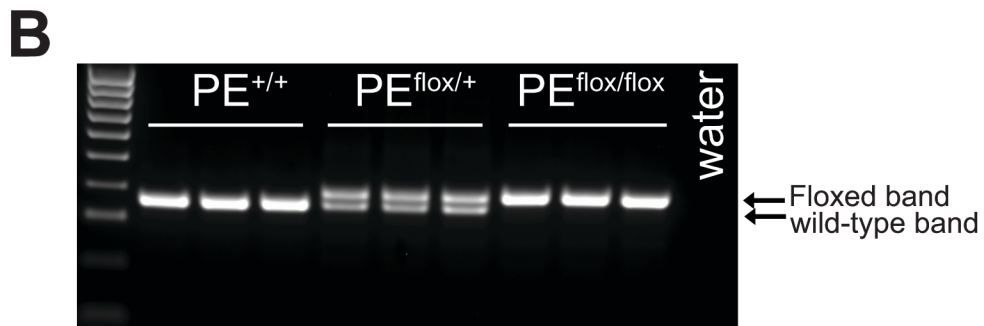

83

84 **Supplementary Figure 11.** Generation of PE conditional knockout mice. **A**, Schematic

85 representation of the wild type *Rnls* locus and CRISPR/Cas9-strategy to obtain PE

86 knockout mice. Specific coordinates of the floxed region are shown at the bottom. **B**,

87 Genotyping of PE conditional knockout mice.

88

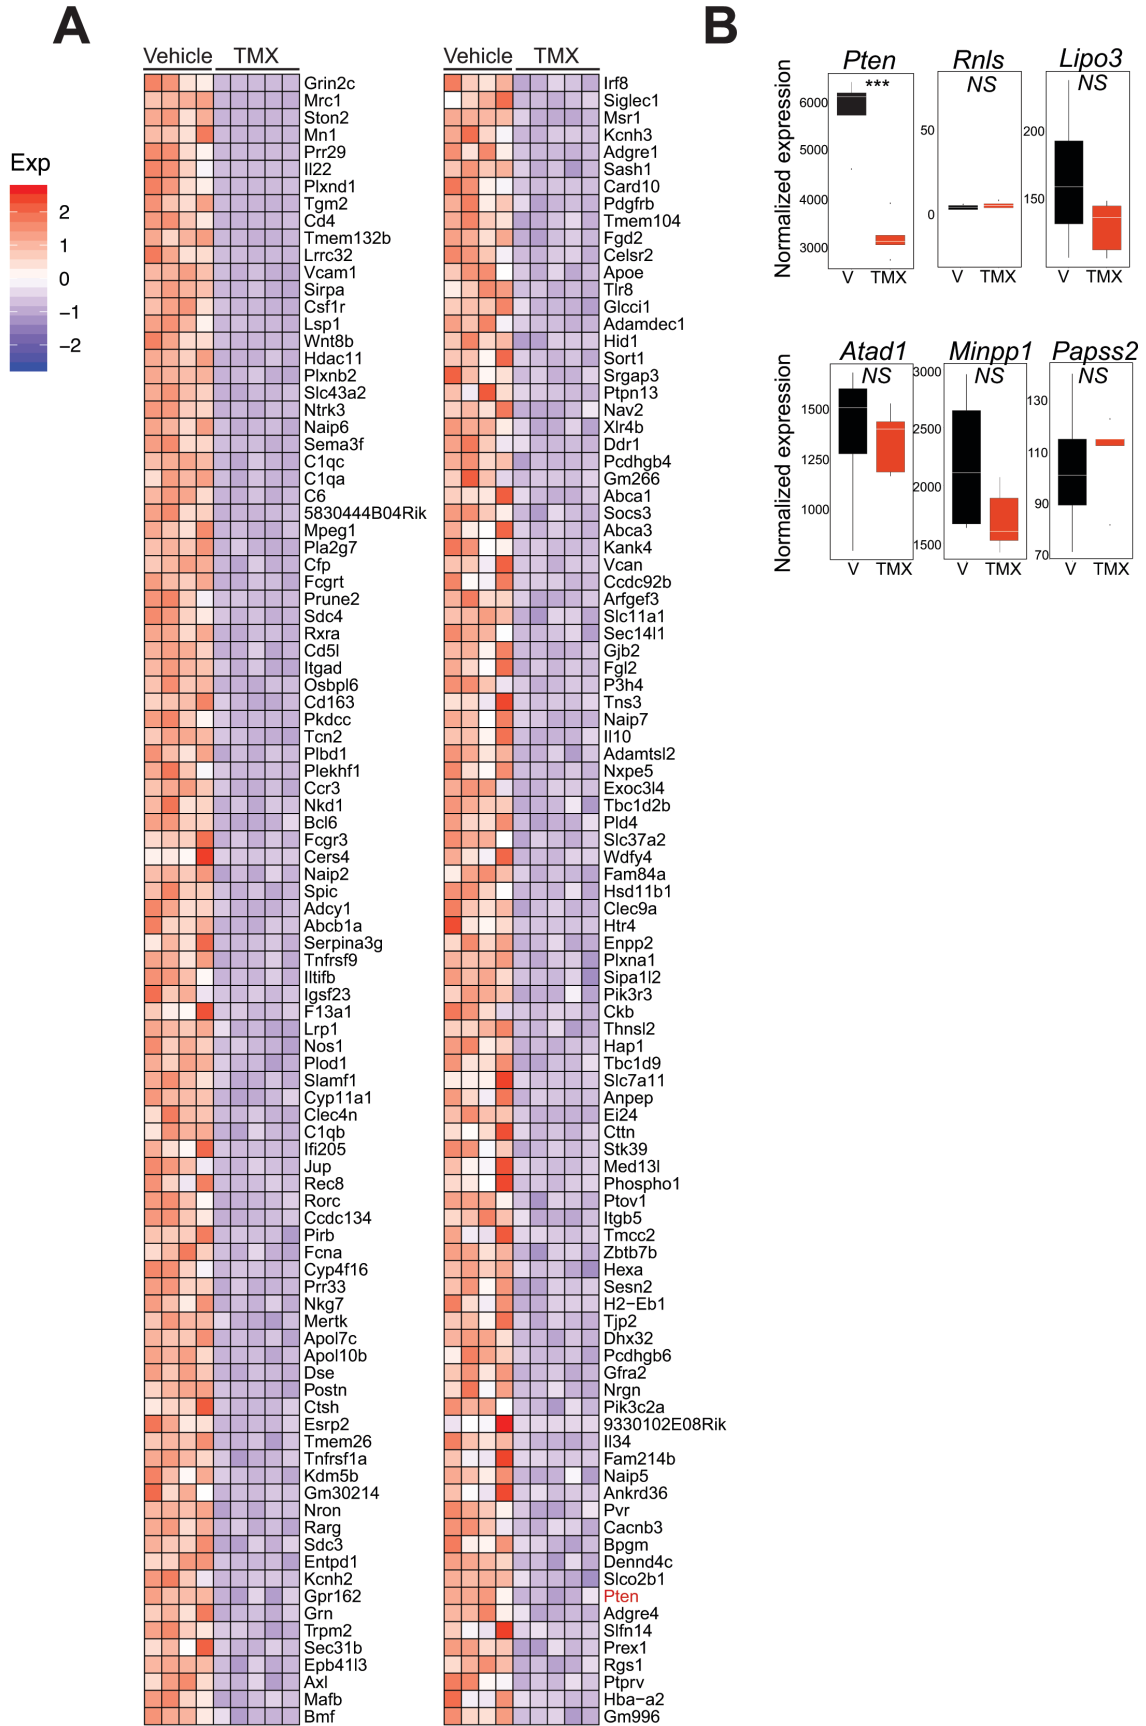

90 **Supplementary Figure 12.** Gene expression changes upon secondary loss of PE in  
91 mouse T-ALL. **A**, Full heat map list of downregulated genes upon secondary PE loss in  
92 PE conditional knockout T-ALL. Cutoffs used: Wald statistic < -5 or > 5; *P*-adjusted value  
93 < 1E-04). **B**, Gene expression changes in *Pten*, *Rnls* and other genes in neighboring  
94 TADs (*Atad1*, *Minpp1*, *Lipo3*, *Papss2*) treated with Vehicle (V) or Tamoxifen (TMX) to  
95 induce PE loss. Significance calculated using the Mann-Whitney test (\*\**P* <1E-04;  
96 NS=not significant).

97



**A**

| SAMPLE NAME           | <i>PTEN</i> CDS deletions                                                                                                                    | PE enhancer deletions            | <i>NOTCH1/FBXW7</i> mutational status |
|-----------------------|----------------------------------------------------------------------------------------------------------------------------------------------|----------------------------------|---------------------------------------|
| SJALL015247_D1-PARMIH | 89623758-89690024 (heterozygous)<br>89690024-89932052 (homozygous)                                                                           | 89932052-90171290 (heterozygous) | MUTANT                                |
| SJALL015278_D1-PARJPL | 89251655-89629121 (heterozygous)<br>89629531-89779737 (homozygous)                                                                           | 89952294-90165341 (homozygous)   | MUTANT                                |
| SJALL015688_D1-PATSIL | 89081178-89626462 (heterozygous)<br>89626462-89663879 (heterozygous)<br>89663879-89702405 (heterozygous)<br>89702405-89745782 (heterozygous) | 89745782-90940820 (heterozygous) | MUTANT                                |
| SJALL002373_D1-PASKCL | WT                                                                                                                                           | 89755359-91198159 (heterozygous) | WT                                    |
| SJALL0085_D           | 89613581-89636910 (heterozygous)<br>89636910-89642937 (heterozygous)<br>89642937-89755359 (heterozygous)                                     | 89755359-90787680 (homozygous)   | WT                                    |

**B**

Normal donor T-cells

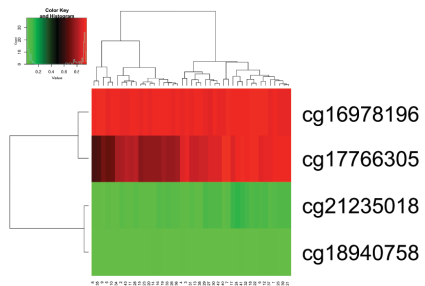**C**

T-ALL Sanger Cell lines

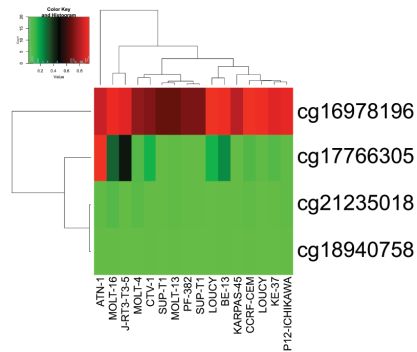**D**

T-ALL primary samples

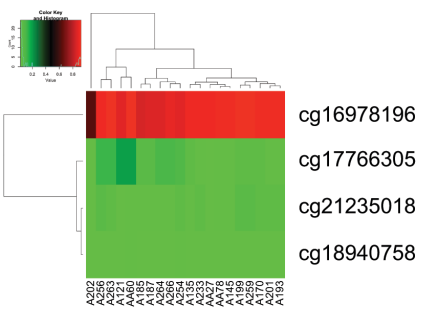

98

99 **Supplementary Figure 13.** Genomic deletions and DNA methylation along the PE100 sequence in human T-ALL primary samples. **A**, Table showings specific genomic101 coordinates of deletions in *PTEN* and/or PE, as well as *NOTCH1/FBXW7* mutational102 status in human primary T-ALL samples. **B-D**, Unsupervised clustering (euclidean

103 distance, complete-linkage clustering) and heatmap of the 4 CpGs sites in the PE

104 sequence in healthy donors T-cells (**B**), human T-ALL cell lines (**C**) or human T-ALL105 primary samples (**D**). Green and red colors represent methylation Beta values: green for

106 hypomethylation and red for hypermethylation. CpGs are displayed in rows and samples

107 in columns.

108

| <b>Strain 6 PE<sup>+/-</sup> x PE<sup>+/-</sup></b> |                                            |                                  |
|-----------------------------------------------------|--------------------------------------------|----------------------------------|
| Genotype                                            | Expected Mendelian genetic frequencies (%) | Observed frequencies (%) (n=364) |
| PE <sup>+/+</sup>                                   | 25<br>(50% females, 50% males)             | 25<br>(54% females, 46% males)   |
| PE <sup>+/-</sup>                                   | 50<br>(50% females, 50% males)             | 53<br>(53% females, 47% males)   |
| PE <sup>-/-</sup>                                   | 25<br>(50% females, 50% males)             | 22<br>(54% females, 46% males)   |

| <b>Strain 15 PE<sup>+/-</sup> x PE<sup>+/-</sup></b> |                                            |                                  |
|------------------------------------------------------|--------------------------------------------|----------------------------------|
| Genotype                                             | Expected Mendelian genetic frequencies (%) | Observed frequencies (%) (n=192) |
| PE <sup>+/+</sup>                                    | 25<br>(50% females, 50% males)             | 25.5<br>(55% females, 45% males) |
| PE <sup>+/-</sup>                                    | 50<br>(50% females, 50% males)             | 46<br>(44% females, 56% males)   |
| PE <sup>-/-</sup>                                    | 25<br>(50% females, 50% males)             | 28.5<br>(42% females, 58% males) |

| <b>Strain 18 PE<sup>+/-</sup> x PE<sup>+/-</sup></b> |                                            |                                  |
|------------------------------------------------------|--------------------------------------------|----------------------------------|
| Genotype                                             | Expected Mendelian genetic frequencies (%) | Observed frequencies (%) (n=342) |
| PE <sup>+/+</sup>                                    | 25<br>(50% females, 50% males)             | 23<br>(45% females, 45% males)   |
| PE <sup>+/-</sup>                                    | 50<br>(50% females, 50% males)             | 53<br>(52% females, 48% males)   |
| PE <sup>-/-</sup>                                    | 25<br>(50% females, 50% males)             | 24<br>(59% females, 41% males)   |

109

110 **Supplementary Table 1.** Genetic frequencies in PE<sup>+/-</sup> x PE<sup>+/-</sup> offsprings.

111

| NAME                                                | NOM p-val |
|-----------------------------------------------------|-----------|
| KEGG_PRION_DISEASES                                 | 0         |
| APPEL_IMATINIB_RESPONSE                             | 0         |
| ICHIBA_GRAFT_VERSUS_HOST_DISEASE_35D_UP             | 0         |
| LEE_AGING_CEREBELLUM_UP                             | 0         |
| LIAN_LIPA_TARGETS_6M                                | 0         |
| BOQUEST_STEM_CELL_CULTURED_VS_FRESH_DN              | 0         |
| LIAN_LIPA_TARGETS_3M                                | 0         |
| ICHIBA_GRAFT_VERSUS_HOST_DISEASE_D7_UP              | 0         |
| VALK_AML_CLUSTER_5                                  | 0         |
| PAL_PRMT5_TARGETS_DN                                | 0         |
| ROSS_AML_WITH_CFBF_MYH11_FUSION                     | 0         |
| NADLER_OBESITY_UP                                   | 0         |
| MARKEY_RB1_CHRONIC_LOF_DN                           | 0         |
| DACOSTA_ERCC3_ALLELE_XPCS_VS_TTD_UP                 | 0         |
| YAMASHITA_LIVER_CANCER_STEM_CELL_UP                 | 0         |
| STEARMAN_TUMOR_FIELD_EFFECT_UP                      | 0         |
| MOREAUX_B_LYMPHOCYTE_MATURATION_BY_TACI_UP          | 0         |
| KEGG_TOLL_LIKE_RECEPTOR_SIGNALING_PATHWAY           | 0         |
| COATES_MACROPHAGE_M1_VS_M2_UP                       | 0         |
| KEGG_LYSOSOME                                       | 0         |
| RAMALHO_STEMNESS_DN                                 | 0         |
| PAPASPYRIDONOS_UNSTABLE_ATEROSCLEROTIC_PLAQUE_UP    | 0         |
| RUTELLA_RESPONSE_TO_CSF2RB_AND_IL4_DN               | 0         |
| KEGG_THYROID_CANCER                                 | 0         |
| LENAOUR_DENDRITIC_CELL_MATURATION_UP                | 0         |
| DORSAM_HOXA9_TARGETS_DN                             | 0         |
| LEE_LIVER_CANCER_CIPROFIBRATE_UP                    | 0         |
| WILENSKY_RESPONSE_TO_DARAPLADIB                     | 0         |
| KEGG_ABC_TRANSPORTERS                               | 0         |
| GAL_LEUKEMIC_STEM_CELL_UP                           | 0         |
| RUTELLA_RESPONSE_TO_HGF_VS_CSF2RB_AND_IL4_UP        | 0         |
| HOSHIDA_LIVER_CANCER_LATE_RECURRENCE_UP             | 0         |
| ZHAN_MULTIPLE_MYELOMA_DN                            | 0         |
| RADMACHER_AML_PROGNOSIS                             | 0         |
| RUTELLA_RESPONSE_TO_HGF_UP                          | 0         |
| LIU_VAV3_PROSTATE_CARCINOGENESIS_UP                 | 0         |
| STEARMAN_LUNG_CANCER_EARLY_VS_LATE_DN               | 0         |
| REACTOME_DISEASES_OF_IMMUNE_SYSTEM                  | 0         |
| NAKAMURA_CANCER_MICROENVIRONMENT_UP                 | 0         |
| OZANNE_AP1_TARGETS_UP                               | 0         |
| MCBRYAN_PUBERTAL_BREAST_5_6WK_DN                    | 0         |
| KUROZUMI_RESPONSE_TO_ONCOCYTIC_VIRUS_AND_CYCLIC_RGD | 0         |
| KATSANOUELAVL1_TARGETS_UP                           | 0         |
| KYNG_WERNER_SYNDROM_DN                              | 0         |

|                                                     |   |
|-----------------------------------------------------|---|
| PID_INTEGRIN2_PATHWAY                               | 0 |
| PID_ANTHRAX_PATHWAY                                 | 0 |
| REACTOME_TRANSCRIPTIONAL_REGULATION_OF_WHITE_ADIPOC | 0 |
| SHIN_B_CELL_LYMPHOMA_CLUSTER_3                      | 0 |
| REACTOME_NUCLEOBASE_CATABOLISM                      | 0 |
| JAATINEN_HEMATOPOIETIC_STEM_CELL_DN                 | 0 |
| ADDYA_ERYTHROID_DIFFERENTIATION_BY_HEMIN            | 0 |
| BROWNE_HCMV_INFECTION_2HR_UP                        | 0 |
| REACTOME_NUCLEAR_RECEPTOR_TRANSCRIPTION_PATHWAY     | 0 |
| PID_RETINOIC_ACID_PATHWAY                           | 0 |
| PEPPER_CHRONIC_LYMPHOCYTIC_LEUKEMIA_UP              | 0 |
| REACTOME_ROLE_OF_PHOSPHOLIPIDS_IN_PHAGOCYTOSIS      | 0 |
| BASSO_HAIRY_CELL_LEUKEMIA_UP                        | 0 |
| FULCHER_INFLAMMATORY_RESPONSE_LECTIN_VS_LPS_DN      | 0 |
| MARKEY_RB1_ACUTE_LOF_DN                             | 0 |
| REACTOME_OTHER_SEMAPHORIN_INTERACTIONS              | 0 |
| SEKI_INFLAMMATORY_RESPONSE_LPS_DN                   | 0 |
| BROWN_MYELOID_CELL_DEVELOPMENT_UP                   | 0 |
| MCLACHLAN_DENTAL_CARIES_UP                          | 0 |
| GAUSSMANN_MLL_AF4_FUSION_TARGETS_D_UP               | 0 |
| PETROVA_ENDOTHELIUM_LYMPHATIC_VS_BLOOD_DN           | 0 |
| KEGG_LEISHMANIA_INFECTION                           | 0 |
| ZHAN_MULTIPLE_MYELOMA_CD1_UP                        | 0 |
| JAZAERI_BREAST_CANCER_BRCA1_VS_BRCA2_DN             | 0 |
| RAMASWAMY_METASTASIS_DN                             | 0 |
| REACTOME_DISEASES_OF_GLYCOSYLATION                  | 0 |
| ODONNELL_TARGETS_OF_MYC_AND_TFRC_UP                 | 0 |
| ONDER_CDH1_TARGETS_1_UP                             | 0 |
| NAKAYAMA_SOFT_TISSUE_TUMORS_PCA1_UP                 | 0 |
| PID_IL23_PATHWAY                                    | 0 |
| BIOCARTA_P53HYPOXIA_PATHWAY                         | 0 |
| PID_P38_ALPHA_BETA_DOWNSTREAM_PATHWAY               | 0 |
| CHIN_BREAST_CANCER_COPY_NUMBER_UP                   | 0 |
| FISCHER_DIRECT_P53_TARGETS_META_ANALYSIS            | 0 |
| REACTOME_ABC_TRANSPORTERS_IN_LIPID_HOMEOSTASIS      | 0 |
| THUM_SYSTOLIC_HEART_FAILURE_UP                      | 0 |
| LINDSTEDT_DENDRITIC_CELL_MATURATION_D               | 0 |
| REACTOME_GOLGI_ASSOCIATED_VESICLE_BIOGENESIS        | 0 |
| RUTELLA_RESPONSE_TO_CSF2RB_AND_IL4_UP               | 0 |
| LENAOUR_DENDRITIC_CELL_MATURATION_DN                | 0 |
| QI_PLASMACYTOMA_UP                                  | 0 |
| PID_INTEGRIN_A9B1_PATHWAY                           | 0 |
| ABBUD_LIF_SIGNALING_1_DN                            | 0 |
| WANG_BARRETTES_ESOPHAGUS_AND_ESOPHAGUS_CANCER_DN    | 0 |
| MCBRYAN_PUBERTAL_TGFB1_TARGETS_UP                   | 0 |

|                                                     |   |
|-----------------------------------------------------|---|
| BOHN_PRIMARY_IMMUNODEFICIENCY_SYNDROM_DN            | 0 |
| SANSOM_APC_TARGETS_DN                               | 0 |
| GOZGIT_ESR1_TARGETS_UP                              | 0 |
| WOOD_EBV_EBNA1_TARGETS_DN                           | 0 |
| MORI_EMU_MYC_LYMPHOMA_BY_ONSET_TIME_DN              | 0 |
| WEIGEL_OXIDATIVE_STRESS_BY_HNE_AND_TBH              | 0 |
| SMIRNOV_CIRCULATING_ENDOTHELIOCYTES_IN_CANCER_UP    | 0 |
| DELYS_THYROID_CANCER_UP                             | 0 |
| REACTOME_INTERLEUKIN_4_AND_INTERLEUKIN_13_SIGNALING | 0 |
| REACTOME_TOLL LIKE RECEPTOR_CASCADES                | 0 |
| TONKS_TARGETS_OF_RUNX1_RUNX1T1_FUSION_MONOCYTE_DN   | 0 |
| RICKMAN_TUMOR_DIFFERENTIATED_WELL_VS_POORLY_DN      | 0 |
| KEGG_ARRHYTHMOGENIC_RIGHT_VENTRICULAR_CARDIOMYOPAT  | 0 |
| PID_GMCSF_PATHWAY                                   | 0 |
| PID_EPHB_FWD_PATHWAY                                | 0 |
| REACTOME_REGULATION_OF_LIPID_METABOLISM_BY_PEROXISO | 0 |
| HAN_JNK_SINGALING_DN                                | 0 |
| REACTOME_SEMAPHORIN_INTERACTIONS                    | 0 |
| KYNG_NORMAL_AGING_DN                                | 0 |
| BIOCARTA_NUCLEARRS_PATHWAY                          | 0 |
| TAKEDA_TARGETS_OF_NUP98_HOXA9_FUSION_8D_DN          | 0 |
| PID_IL4_2PATHWAY                                    | 0 |
| WANG_RESPONSE_TO_GSK3_INHIBITOR_SB216763_UP         | 0 |
| PID_IL6_7_PATHWAY                                   | 0 |
| LUI_THYROID_CANCER_CLUSTER_2                        | 0 |
| FLECHNER_BIOPSY_KIDNEY_TRANSPLANT_REJECTED_VS_OK_UP | 0 |
| ZHAN_MULTIPLE_MYELOMA_CD1_VS_CD2_UP                 | 0 |
| RODWELL_AGING_KIDNEY_NO_BLOOD_UP                    | 0 |
| ZHAN_MULTIPLE_MYELOMA_CD1_DN                        | 0 |
| DIAZ_CHRONIC_MEYLOGENOUS_LEUKEMIA_DN                | 0 |
| MARTIN_NFKB_TARGETS_UP                              | 0 |
| JECHLINGER_EPITHELIAL_TO_MESENCHYMAL_TRANSITION_DN  | 0 |
| SCHOEN_NFKB_SIGNALING                               | 0 |
| PETROVA_PROX1_TARGETS_DN                            | 0 |
| KEGG_ALLOGRAFT_REJECTION                            | 0 |
| LU_TUMOR_ENDOTHELIAL_MARKERS_UP                     | 0 |
| TAKEDA_TARGETS_OF_NUP98_HOXA9_FUSION_10D_DN         | 0 |
| YAO_HOXA10_TARGETS_VIA_PROGESTERONE_UP              | 0 |
| HOFFMANN_LARGE_TO_SMALL_PRE_BII_LYMPHOCYTE_DN       | 0 |
| NIKOLSKY_BREAST_CANCER_17Q21_Q25_AMPLICON           | 0 |
| HOEBEKE_LYMPHOID_STEM_CELL_UP                       | 0 |
| MARTIN_VIRAL_GPCR_SIGNALING_UP                      | 0 |
| ZHANG_BREAST_CANCER_PROGENITORS_DN                  | 0 |
| REACTOME_HEPARAN_SULFATE_HEPARIN_HS_GAG_METABOLISM  | 0 |
| WANG_ESOPHAGUS_CANCER_VS_NORMAL_UP                  | 0 |

|                                                     |   |
|-----------------------------------------------------|---|
| PID_PTP1B_PATHWAY                                   | 0 |
| REACTOME_TRANSCRIPTIONAL_REGULATION_BY_THE_AP_2_TFA | 0 |
| VERHAAK_AML_WITH_NPM1_MUTATED_UP                    | 0 |
| TAVOR_CEBPA_TARGETS_UP                              | 0 |
| PID_NECTIN_PATHWAY                                  | 0 |
| YANG_BREAST_CANCER_ESR1_BULK_DN                     | 0 |
| KEGG_CELL_ADHESION_MOLECULES_CAMS                   | 0 |
| KOBAYASHI_EGFR_SIGNALING_24HR_UP                    | 0 |
| FAELT_B_CLL_WITH_VH_REARRANGEMENTS_UP               | 0 |
| HORIUCHI_WTAP_TARGETS_UP                            | 0 |
| REACTOME_IMMUNOREGULATORY_INTERACTIONS_BETWEEN_A    | 0 |
| REACTOME_INTERACTION_BETWEEN_L1_AND_ANKYRINS        | 0 |
| REACTOME_PHOSPHOLIPID_METABOLISM                    | 0 |
| MATSUDA_NATURAL_KILLER_DIFFERENTIATION              | 0 |
| CROONQUIST_NRAS_VS_STROMAL_STIMULATION_UP           | 0 |
| WIELAND_UP_BY_HBV_INFECTION                         | 0 |
| VERHAAK_GLIOMASTOMA_MESENCHYMAL                     | 0 |
| BIOCARTA_NKT_PATHWAY                                | 0 |
| BOYLAN_MULTIPLE_MYELOMA_C_DN                        | 0 |
| SAKAI_TUMOR_INFILTRATING_MONOCYTES_UP               | 0 |
| MAHAJAN_RESPONSE_TO_IL1A_DN                         | 0 |
| BANDRES_RESPONSE_TO_CARMUSTIN_MGMT_24HR_DN          | 0 |
| MARZEC_IL2_SIGNALING_DN                             | 0 |
| BORCZUK_MALIGNANT_MESOTHELIOMA_DN                   | 0 |
| CHO_NR4A1_TARGETS                                   | 0 |
| CASORELLI_ACUTE_PROMYELOCYTIC_LEUKEMIA_UP           | 0 |
| BIOCARTA_IL1R_PATHWAY                               | 0 |
| BIOCARTA_TOLL_PATHWAY                               | 0 |
| WORSCHER_TUMOR_REJECTION_UP                         | 0 |
| BIOCARTA_LAIR_PATHWAY                               | 0 |
| PID_RB_1PATHWAY                                     | 0 |
| PID_SYNDECAN_3_PATHWAY                              | 0 |
| BURTON_ADIPOGENESIS_8                               | 0 |
| PID_TCPTP_PATHWAY                                   | 0 |
| PEREZ_TP53_AND_TP63_TARGETS                         | 0 |
| BROWNE_HCMV_INFECTION_18HR_DN                       | 0 |
| REACTOME_GLYCEROPHOSPHOLIPID_BIOSYNTHESIS           | 0 |
| PARK_APL_PATHOGENESIS_DN                            | 0 |
| PID_DELTA_NP63_PATHWAY                              | 0 |
| MORI_PLASMA_CELL_DN                                 | 0 |
| HESS_TARGETS_OF_HOXA9_AND_MEIS1_DN                  | 0 |
| YAO_TEMPORAL_RESPONSE_TO_PROGESTERONE_CLUSTER_0     | 0 |
| LIAN_NEUTROPHIL_GRANULE_CONSTITUENTS                | 0 |
| CASORELLI_APL_SECONDARY_VS_DE_NOVO_UP               | 0 |
| HAHTOLA_MYCOSIS_FUNGOIDES_CD4_UP                    | 0 |

|                                                     |   |
|-----------------------------------------------------|---|
| SMID_BREAST_CANCER_NORMAL_LIKE_UP                   | 0 |
| CROONQUIST_NRAS_SIGNALING_UP                        | 0 |
| SEKI_INFLAMMATORY_RESPONSE_LPS_UP                   | 0 |
| KEGG_DILATED_CARDIOMYOPATHY                         | 0 |
| REACTOME_SIGNALING_BY_RETINOIC_ACID                 | 0 |
| THEODOROU_MAMMARY_TUMORIGENESIS                     | 0 |
| HERNANDEZ_ABERRANT_MITOSIS_BY_DOCETACEL_4NM_UP      | 0 |
| MORI_LARGE_PRE_BII_LYMPHOCYTE_DN                    | 0 |
| PEREZ_TP63_TARGETS                                  | 0 |
| GAVIN_FOXP3_TARGETS_CLUSTER_P3                      | 0 |
| ROZANOV_MMP14_TARGETS_DN                            | 0 |
| PID_EPO_PATHWAY                                     | 0 |
| HOWLIN_PUBERTAL_MAMMARY_GLAND                       | 0 |
| YU_MYC_TARGETS_DN                                   | 0 |
| CLIMENT_BREAST_CANCER_COPY_NUMBER_UP                | 0 |
| GRAESSMANN_RESPONSE_TO_MC_AND_SERUM_DEPRIVATION_U   | 0 |
| KEGG_AXON_GUIDANCE                                  | 0 |
| NABA_ECM_AFFILIATED                                 | 0 |
| KEGG_PROSTATE_CANCER                                | 0 |
| GAURNIER_PSMD4_TARGETS                              | 0 |
| CHEN_LVAD_SUPPORT_OF_FAILING_HEART_UP               | 0 |
| RODRIGUES_NTN1_TARGETS_DN                           | 0 |
| STEGER_ADIPOGENESIS_UP                              | 0 |
| VERNOCHET_ADIPOGENESIS                              | 0 |
| BIOCARTA_SPPA_PATHWAY                               | 0 |
| BROWNE_HCMV_INFECTION_30MIN_UP                      | 0 |
| PID_ATF2_PATHWAY                                    | 0 |
| RODWELL_AGING_KIDNEY_UP                             | 0 |
| SMIRNOV_RESPONSE_TO_IR_6HR_UP                       | 0 |
| REACTOME_DEFECTIVE_B4GALT7_CAUSES_EDS_PROGEROID_TYP | 0 |
| SHIN_B_CELL_LYMPHOMA_CLUSTER_8                      | 0 |
| OLSSON_E2F3_TARGETS_UP                              | 0 |
| MOROSETTI_FACIOSCAPULOHUMERAL_MUSCULAR_DISTROPHY_U  | 0 |
| RAY_TUMORIGENESIS_BY_ERBB2_CDC25A_DN                | 0 |
| BILBAN_B_CLL_LPL_UP                                 | 0 |
| ZHAN_MULTIPLE_MYELOMA_LB_UP                         | 0 |
| KEGG_HYPERTROPHIC_CARDIOMYOPATHY_HCM                | 0 |
| PID_CMYB_PATHWAY                                    | 0 |
| POOLA_INVASIVE_BREAST_CANCER_DN                     | 0 |
| HELLER_SILENCED_BY_METHYLATION_UP                   | 0 |
| ONO_FOXP3_TARGETS_UP                                | 0 |
| RODRIGUES_DCC_TARGETS_DN                            | 0 |
| PID_NCADHERIN_PATHWAY                               | 0 |
| BOSCO_TH1_CYTOTOXIC_MODULE                          | 0 |
| COATES_MACROPHAGE_M1_VS_M2_DN                       | 0 |

|                                                      |   |
|------------------------------------------------------|---|
| LU_TUMOR_VASCULATURE_UP                              | 0 |
| YAUCH_HEDGEHOG_SIGNALING_PARACRINE_UP                | 0 |
| KONDO_PROSTATE_CANCER_WITH_H3K27ME3                  | 0 |
| KEGG_MELANOMA                                        | 0 |
| REACTOME_ROS_AND_RNS_PRODUCTION_IN_PHAGOCYTES        | 0 |
| BONOME_OVARIAN_CANCER_SURVIVAL_OPTIMAL_DEBULKING     | 0 |
| VALK_AML_CLUSTER_9                                   | 0 |
| REACTOME_CIRCADIAN_CLOCK                             | 0 |
| RUTELLA_RESPONSE_TO_HGF_DN                           | 0 |
| SCHLESINGER_H3K27ME3_IN_NORMAL_AND_METHYLATED_IN_CA  | 0 |
| MASSARWEH_TAMOXIFEN_RESISTANCE_DN                    | 0 |
| KLEIN_PRIMARY EFFUSION LYMPHOMA_DN                   | 0 |
| KEGG_CYTOKINE_CYTOKINE_RECEPTOR_INTERACTION          | 0 |
| FOSTER_TOLERANT_MACROPHAGE_UP                        | 0 |
| SHEN_SMARCA2_TARGETS_DN                              | 0 |
| KEGG_REGULATION_OF_ACTIN_CYTOSKELETON                | 0 |
| AMIT_SERUM_RESPONSE_40_MCF10A                        | 0 |
| REACTOME_COMPLEMENT_CASCADE                          | 0 |
| WALLACE_PROSTATE_CANCER_RACE_UP                      | 0 |
| ALTEMEIER_RESPONSE_TO_LPS_WITH_MECHANICAL_VENTILATIO | 0 |
| NOUZOVA_METHYLATED_IN_APL                            | 0 |
| REACTOME_NEUTROPHIL_DEGRANULATION                    | 0 |
| KUROZUMI_RESPONSE_TO_ONCOCYTIC_VIRUS                 | 0 |
| CHARAFE_BREAST_CANCER_LUMINAL_VS_MESENCHYMAL_UP      | 0 |
| KEGG_PATHWAYS_IN_CANCER                              | 0 |
| SHETH_LIVER_CANCER_VS_TXNIP_LOSS_PAM5                | 0 |
| MOLENAAR_TARGETS_OF_CCND1_AND_CDK4_UP                | 0 |
| FOSTER_TOLERANT_MACROPHAGE_DN                        | 0 |
| WANG_TNF_TARGETS                                     | 0 |
| BIOCARTA_ETS_PATHWAY                                 | 0 |
| GAVIN_FOXP3_TARGETS_CLUSTER_P4                       | 0 |
| WANG_IMMORTALIZED_BY_HOXA9_AND_MEIS1_UP              | 0 |
| REACTOME_CLATHRIN_MEDIATED_ENDOCYTOSIS               | 0 |
| MOREAUX_MULTIPLE_MYELOMA_BY_TACI_UP                  | 0 |
| ZHU_SKIL_TARGETS_UP                                  | 0 |
| KOYAMA_SEMA3B_TARGETS_UP                             | 0 |
| CARD_MIR302A_TARGETS                                 | 0 |
| PHONG_TNF_RESPONSE_VIA_P38_PARTIAL                   | 0 |
| IKEDA_MIR30_TARGETS_DN                               | 0 |
| BASSO_CD40_SIGNALING_DN                              | 0 |
| REACTOME_TNFS_BIND THEIR PHYSIOLOGICAL RECEPTORS     | 0 |
| ROSS_AML_WITH_MLL_FUSIONS                            | 0 |
| KANG_IMMORTALIZED_BY_TERT_UP                         | 0 |
| ALONSO_METASTASIS_NEURAL_UP                          | 0 |
| KEGG_CHEMOKINE_SIGNALING_PATHWAY                     | 0 |



|                                                  |   |
|--------------------------------------------------|---|
| HELLEBREKERS_SILENCED_DURING_TUMOR_ANGIOGENESIS  | 0 |
| KYNG_DNA_DAMAGE_BY_4NQO_OR_UV                    | 0 |
| GAUSSMANN_MLL_AF4_FUSION_TARGETS_F_UP            | 0 |
| URS_ADIPOCYTE_DIFFERENTIATION_UP                 | 0 |
| REACTOME_SIGNALING_BY_ERBB4                      | 0 |
| MARTIN_INTERACT_WITH_HDAC                        | 0 |
| DUTERTRE ESTRADIOL_RESPONSE_6HR_DN               | 0 |
| CHYLA_CBFA2T3_TARGETS_UP                         | 0 |
| PURBEY_TARGETS_OF_CTBP1_NOT_SATB1_DN             | 0 |
| BOSCO_ALLERGEN_INDUCED_TH2_ASSOCIATED_MODULE     | 0 |
| FIRESTEIN_PROLIFERATION                          | 0 |
| DURAND_STROMA_S_UP                               | 0 |
| GAZDA_DIAMOND_BLACKFAN_ANEMIA_ERYTHROID_DN       | 0 |
| KESHELAVA_MULTIPLE_DRUG_RESISTANCE               | 0 |
| BHAT_ESR1_TARGETS_NOT_VIA_AKT1_DN                | 0 |
| HOLLERN_EMT_BREAST_TUMOR_DN                      | 0 |
| APPIERTO_RESPONSE_TO_FENRETINIDE_UP              | 0 |
| REACTOME_SYNTHESIS_OF_IP3_AND_IP4_IN_THE_CYTOSOL | 0 |
| PID_SHP2_PATHWAY                                 | 0 |
| MASSARWEH_TAMOXIFEN_RESISTANCE_UP                | 0 |
| RIGGI_EWING_SARCOMA_PROGENITOR_UP                | 0 |
| LIN_TUMOR_ESCAPE_FROM_IMMUNE_ATTACK              | 0 |
| LIM_MAMMARY_LUMINAL_MATURE_UP                    | 0 |
| OSADA_ASCL1_TARGETS_UP                           | 0 |
| TURASHVILI_BREAST_CARCINOMA_DUCTAL_VS_LOBULAR_UP | 0 |
| ZHANG_RESPONSE_TO_IKK_INHIBITOR_AND_TNF_UP       | 0 |
| XU_GH1_AUTOCRINE_TARGETS_UP                      | 0 |
| REACTOME_OTHER_INTERLEUKIN_SIGNALING             | 0 |
| CUI_TCF21_TARGETS_DN                             | 0 |
| GRAHAM_CML QUIESCENT_VS_NORMAL_DIVIDING_UP       | 0 |
| DURCHDEWALD_SKIN_CARCINOGENESIS_DN               | 0 |
| BIOCARTA_FMLP_PATHWAY                            | 0 |
| ACEVEDO_LIVER_TUMOR_VS_NORMAL_ADJACENT_TISSUE_DN | 0 |
| TARTE_PLASMA_CELL_VS_PLASMABLAST_UP              | 0 |
| ASTON_MAJOR_DEPRESSIVE_DISORDER_DN               | 0 |
| RUTELLA_RESPONSE_TO_HGF_VS_CSF2RB_AND_IL4_DN     | 0 |
| VILIMAS_NOTCH1_TARGETS_DN                        | 0 |
| BROWNE_HCMV_INFECTION_20HR_UP                    | 0 |
| REACTOME_NETRIN_1_SIGNALING                      | 0 |
| REACTOME_PI3K_AKT_SIGNALING_IN_CANCER            | 0 |
| BHAT_ESR1_TARGETS_VIA_AKT1_DN                    | 0 |
| REACTOME_INTERLEUKIN_10_SIGNALING                | 0 |
| ZHOU_INFLAMMATORY_RESPONSE_FIMA_UP               | 0 |
| AFFAR_YY1_TARGETS_UP                             | 0 |
| ODONNELL_TFRC_TARGETS_UP                         | 0 |

|                                             |            |
|---------------------------------------------|------------|
| NABA_MATRISOME_ASSOCIATED                   | 0          |
| DUAN_PRDM5_TARGETS                          | 0          |
| MIKKELSEN_NPC_HCP_WITH_H3K4ME3_AND_H3K27ME3 | 0          |
| LINDGREN_BLADDER_CANCER_CLUSTER_1_UP        | 0          |
| BOYLAN_MULTIPLE_MYELOMA_C_CLUSTER_DN        | 0          |
| KEGG_SPHINGOLIPID_METABOLISM                | 0          |
| MCCABE_BOUND_BY_HOXC6                       | 0          |
| PHONG_TNF_RESPONSE_VIA_P38_COMPLETE         | 0          |
| PEDRIOLI_MIR31_TARGETS_UP                   | 0          |
| KEGG_INSULIN_SIGNALING_PATHWAY              | 0          |
| REACTOME_G_ALPHA_I_SIGNALING_EVENTS         | 0          |
| DAVIES_MULTIPLE_MYELOMA_VS_MGUS_DN          | 0.00376648 |
| HAHTOLA_SEZARY_SYNDROM_DN                   | 0.00409836 |
| CHEMNITZ_RESPONSE_TO_PROSTAGLANDIN_E2_DN    | 0.00424628 |
| BOQUEST_STEM_CELL_UP                        | 0.00434783 |
| BERENJENO_TRANSFORMED_BY_RHOA_FOREVER_DN    | 0.00796813 |
| KEGG_ETHER_LIPID_METABOLISM                 | 0.00914077 |
| ZHOU_INFLAMMATORY_RESPONSE_LIVE_UP          | 0.0092081  |
| SHIN_B_CELL_LYMPHOMA_CLUSTER_7              | 0.00938086 |
| HOFMANN_MYELODYSPLASTIC_SYNDROM_RISK_DN     | 0.0093985  |
| YAGI_AML_RELAPSE_PROGNOSIS                  | 0.0095057  |
| MCCLUNG_CREB1_TARGETS_DN                    | 0.00952381 |
| PID_TXA2PATHWAY                             | 0.00968992 |
| PID_RXR_VDR_PATHWAY                         | 0.00970874 |
| ZIRN_TRETINOIN_RESPONSE_WT1_UP              | 0.00974659 |
| WANG_METASTASIS_OF_BREAST_CANCER_ESR1_DN    | 0.00982318 |
| SWEET_LUNG_CANCER_KRAS_UP                   | 0.00982318 |

119

120 **Supplementary Table 2.** Gene Set Enrichment Analyses (GSEA) in PE conditional  
121 knockout leukemias. GSEA analyses against the C2 database using our PE conditional  
122 knockout T-ALL RNA-seq data revealed 342 gene sets significantly downregulated  
123 (nominal  $P < 0.01$ ) upon loss of PE.

| Technique   | Name                                           | Sequence (5'→3')          |
|-------------|------------------------------------------------|---------------------------|
| 4C-seq      | Human <i>PTEN</i> promoter viewpoint (forward) | AAATATCAACACTGAAGCTT      |
|             | Human <i>PTEN</i> promoter viewpoint (reverse) | GCCTCCAGTTGATTTCCAGA      |
|             | Human PE viewpoint (forward)                   | CAGCTTCTCCTTTTAAGCTT      |
|             | Human PE viewpoint (reverse)                   | CACAGACATAATGCTGGGAA      |
|             | Mouse <i>Pten</i> promoter viewpoint (forward) | GTTCATCCTGAGTAAAGCTT      |
|             | Mouse <i>Pten</i> promoter viewpoint (reverse) | CAAAAGATAATTGGTGAGCA      |
|             | Mouse PE viewpoint (forward)                   | CCTCTATATGAGAGAAGCTT      |
|             | Mouse PE viewpoint (reverse)                   | AAGAGCTGGCCACATGGTGA      |
| CRISPR/Cas9 | Human PE sgRNA 1 (forward)                     | GGATCACTTTCCCACTACGA      |
|             | Human PE sgRNA 2 (forward)                     | GGTGGCCCATTATTAACCTG      |
|             | Mouse PE sgRNA 1 (forward)                     | GCCGTTCTTCTTAATGTGCA      |
|             | Mouse PE sgRNA 2 (forward)                     | GGAAGTGCAACATCACCAG       |
| Genotyping  | Human PE CRISPR/Cas9 (forward 1)               | GTTGGTAAACTACCATCCATGGGC  |
|             | Human PE CRISPR/Cas9 (reverse 1)               | TAAGATGTCACAGTACAACGTGGC  |
|             | Human PE CRISPR/Cas9 (forward 2)               | TGGATGATCCAGGTTAAGCTCTCC  |
|             | Human PE CRISPR/Cas9 (reverse 2)               | GTGACTAGACCAGAGAATCTGAGG  |
|             | Mouse PE CRISPR/Cas9 (forward 1)               | CACTGAGCACTCAAGATGCAAGC   |
|             | Mouse PE CRISPR/Cas9 (reverse 1)               | GGTCCTTCTGAAGACAGTGTGAG   |
|             | Mouse PE CRISPR/Cas9 (forward 2)               | CTCATATAGAGGAAGAGCTGGCC   |
|             | Mouse PE CRISPR/Cas9 g (reverse 2)             | TGCAGGATACCTGATACACGAGC   |
|             | Mouse PE Flox (loxP1 forward)                  | CAGCGATATGGCATAAGCACCTG   |
|             | Mouse PE Flox (loxP1 reverse)                  | ACCAGCAGCCACATCAGCTACAG   |
|             | Mouse PE Flox (loxP2 forward 2)                | GAAAGACTCTGAACTTCCATGTCTC |
|             | Mouse PE Flox (loxP2 reverse 2)                | GATAATGCAGGATACCTGATACAGC |
| qRT-PCR     | Human <i>PTEN</i> (forward)                    | AGCGTGCAGATAATGACAAGG     |
|             | Human <i>PTEN</i> (reverse)                    | TGGATCAGAGTCAGTGGTGTC     |
|             | Mouse <i>Pten</i> (forward)                    | GGGGAAGTAAGGACCAGAGACAAA  |
|             | Mouse <i>Pten</i> (reverse)                    | CCACGGGTCTGTAATCCAGGTG    |
|             | Human <i>RNLS</i> (forward)                    | GTCCGGTCCCTTGTACCTTG      |
|             | Human <i>RNLS</i> (reverse)                    | TGCAGGTGATGTACTGAGCAC     |
|             | Mouse <i>Rnls</i> (forward)                    | AAATCTGTGAGCTACTCCTCTCG   |
|             | Mouse <i>Rnls</i> (reverse)                    | CAGGACCAAGGGACACCAA       |
|             | Mouse $\beta$ -Actin (forward)                 | GGCTGTATTCCCCTCCATCG      |
|             | Mouse $\beta$ -Actin (reverse)                 | CCAGTTGGTAACAATGCCATGT    |
|             | Human <i>GAPDH</i> (forward)                   | GAAGGTGAAGGTCGGAGT        |
|             | Human <i>GAPDH</i> (reverse)                   | GAAGATGGTGATGGGATTTC      |
|             | Mouse <i>Gapdh</i> (forward)                   | TGGCAAAGTGGAGATTGTTGCC    |
|             | Mouse <i>Gapdh</i> (reverse)                   | AAGATGGTGATGGGCTTCCCG     |

124

125 **Supplementary Table 3.** Oligonucleotide sequences.

| Technique                 | Target                  | Company         | Clone      | Cat. number | Dilution                         | Lot. Number |
|---------------------------|-------------------------|-----------------|------------|-------------|----------------------------------|-------------|
| <b>IHC</b>                | PTEN                    | Cell Signaling  | D4.3       | 9188        | 1:200                            | 6, 11/2019  |
| <b>ChIPmentation</b>      | H3K27ac                 | Diagenode       | Polyclonal | C15410174   | 2.33µg/sample                    | A1723-0041D |
| <b>Western Blot</b>       | GAPDH                   | Cell Signaling  | D4C6R      | 97166       | 1:1000                           | 5, 08/2019  |
|                           | pAKT(T308)              | Cell Signaling  | D25E6      | 13038       | 1:1000                           | 7, 12/2019  |
|                           | panAKT                  | Cell Signaling  | 11E7       | 4685        | 1:1000                           | 6, 10/2017  |
|                           | PTEN                    | Cell Signaling  | D4.3       | 9188        | 1:1000                           | 6, 11/2019  |
|                           | ACTIN-HRP               | Sigma-Aldrich   | AC-15      | A3854       | 1:50000                          | 048M4859V   |
|                           | anti-mouse IgG-HRP      | GE Healthcare   |            | NA931V      | 1:10000                          | 9850216     |
|                           | anti-rabbit IgG-HRP     | GE Healthcare   |            | NA934V      | 1:10000                          |             |
| <b>Flow Cytometry</b>     | CD8-α PE                | BD              | 53-6.7     | 553033      | 1:200                            | 7194728     |
|                           | CD4 PE-eFluor 610       | Thermo Fisher   | RM4-5      | 61-0042-82  | 1:400                            | 2044771     |
|                           | CD25 AF488              | Thermo Fisher   | 7D4        | 53-0252-82  | 1:1000                           | 4310205     |
|                           | CD44 PerCP-Cy5.5        | Thermo Fisher   | IM7        | 45-0441-82  | 1:400                            | 4329935     |
|                           | Ly6A/E (Sca-1) PE       | BD              | E13-161.7  | 553336      | 1:400                            | 7248964     |
|                           | CD19 PE-Cy7             | Thermo Fisher   | 1D3        | 25-0193-82  | 1:1200                           | 4341605     |
|                           | CD45R PE                | Thermo Fisher   | RA3-6B2    | 12-0452-82  | 1:1000                           | 4339622     |
|                           | CD8a FITC               | Thermo Fisher   | 53-6.7     | 11-0081-81  | 1:200                            | 4329214     |
|                           | PTEN PE                 | BD              | A2B1       | 560002      | 1:400                            | 8219517     |
|                           | PE Mouse IgG1 k isotype | BD              |            | 559320      | 1:400                            | 9115544     |
| <b>CD4-CD3-enrichment</b> | CD4 Biotin              | Thermo Fisher   | GK1.5      | 13-0041-85  | 1:500                            | 4320100     |
|                           | CD3ε Biotin             | Thermo Fisher   | 145-2C11   | 13-0031-85  | 1:500                            | 2072705     |
|                           | Streptavidin MicroBeads | Miltenyi Biotec |            | 130-048-101 | 20µL per 10 <sup>7</sup> t cells | 5180427037  |

126

127 **Supplementary Table 4. Antibodies.**
